# Supplementary material for: Bio-Derived Fluorescent Carbon Dots: Synthesis, Properties and Applications
Source: MDPI journal article supplement (doi:10.3390/molecules27165329), 2022-08-21
Supplement: s1 [file s1]

# Supplementary Information

## Bio-derived Fluorescent Carbon Dots: Synthesis, Properties and Applications

Manisha Kumari <sup>1</sup>, Ganga Ram Chaudhary <sup>1</sup>, Savita Chaudhary <sup>1,\*</sup>, Ahmad Umar <sup>2,3,\*</sup>,  
Sheikh Akbar <sup>3</sup> and Sotirios Baskoutas <sup>4</sup>

<sup>1</sup> Department of Chemistry and Centre of Advanced Studies in Chemistry, Panjab University, Chandigarh 160014, India

<sup>2</sup> Department of Chemistry, College of Science and Arts, and Promising Centre for Sensors and Electronic Devices (PCSED), Najran University, Najran 11001, Kingdom of Saudi Arabia

<sup>3</sup> Department of Materials Science and Engineering, The Ohio State University, Columbus, OH 43210, USA

<sup>4</sup> Department of Materials Science, University of Patras, 26504 Patras, Greece

\* Correspondence: chemsavita@gmail.com (S.C.); ahmadumar786@gmail.com (A.U.)

† Visiting Professor at Department of Materials Science and Engineering, The Ohio State University, Columbus, OH 43210, USA.

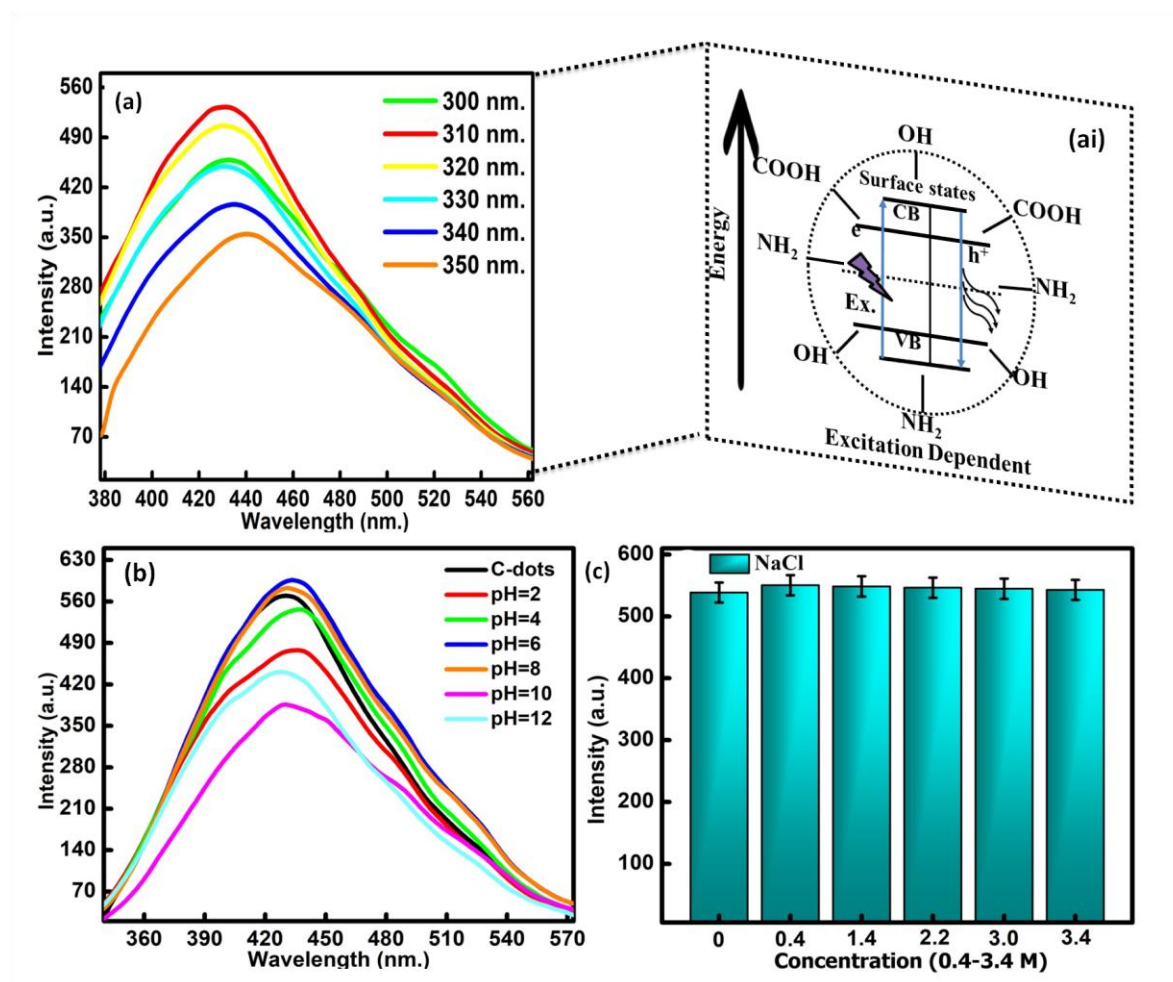

**Figure. S1** (a) Fluorescence emission spectra at different excitation wavelengths, (ai) mechanistic behavior of emission profile CQDs, (b) pH-dependent emission profile and (d) effect of ionic strength on the emission intensity of RS@CQDs.
